# Supplementary material for: Picture Novelty Influences Response Selection and Inhibition: The Role of the In-Group Bias and Task-Difficulty
Source: PLoS One. 2016 Oct 27;11(10):e0165470. doi: 10.1371/journal.pone.0165470 (PMC5082877; doi:10.1371/journal.pone.0165470)
Supplement: S1 Data — (XLSX) [file pone.0165470.s001.xlsx]

## Sheet: RT
sNo	gender_of_participants	NewCongFemale	NewCongMale	NewIncongFemale	NewIncongMale	OldCongFemale	OldCongMale	OldIncongFemale	OldIncongMale
1	Male	632.5	480	580	532.5	598.75	497.5	570	513.75
2	Male	442.5	407.5	458.75	451.25	447.5	420	471.25	448.75
3	Male	576.25	498.75	537.5	530	566.25	542.5	555	477.5
4	Male	408.75	431.25	453.75	437.5	421.25	417.5	445	443.75
5	Male	615	563.75	580	592.5	576.25	652.5	561.25	610
6	Male	703.75	656.25	672.5	676.25	706.25	677.5	692.5	641.25
7	Male	563.75	523.75	547.5	583.75	546.25	593.75	581.25	567.5
8	Male	541.25	471.25	555	566.25	523.75	486.25	587.5	523.75
9	Male	550	526.25	558.75	577.5	562.5	532.5	578.75	553.75
10	Male	551.25	551.25	530	535	572.5	532.5	582.5	545
11	Male	538.75	537.5	588.75	596.25	555	522.5	583.75	548.75
12	Male	511.25	492.5	550	477.5	506.25	501.25	562.5	502.5
13	Male	542.5	503.75	617.5	558.75	553.75	570	596.25	596.25
14	Male	471.25	458.75	488.75	496.25	450	465	492.5	490
15	Male	430	440	461.25	476.25	443.75	455	528.75	485
16	Male	516.25	461.25	488.75	497.5	478.75	472.5	538.75	476.25
17	Male	623.75	673.75	652.5	652.5	636.25	706.25	646.25	680
18	Male	571.25	583.75	568.75	577.5	565	573.75	573.75	608.75
19	Male	583.75	560	573.75	536.25	612.5	565	580	568.75
20	Male	663.75	587.5	633.75	626.25	627.5	652.5	663.75	636.25
1	Female	709.265	646.425	670.475	689.87	649.015	649.34	682.085	679.885
2	Female	521.185	644.635	635.585	591.445	561.58	612.165	620.885	612.15
3	Female	650.685	703.5	654.735	623.975	611.5	648.55	676.925	627.605
4	Female	621.085	672.455	590.43	621.765	592.665	637.135	606.6	663.055
5	Female	529.685	549.73	487.045	541.335	532.02	516.335	494.22	547.375
6	Female	475.695	570.63	522.74	573.43	491.255	551.82	593.59	600.975
7	Female	486.62	549.215	514.54	565.34	525.475	546.62	500.165	625.67
8	Female	565.335	600.765	571.63	586.33	557.465	564.695	605.445	653.335
9	Female	555.79	563.915	634.24	588.405	602.395	538.06	539.905	578.57
10	Female	623.685	663.81	647.27	637.83	636.84	633.82	652.13	690.145
11	Female	618.125	630.755	626.33	639.445	645.12	639.23	612.885	644.455
12	Female	597.53	719.92	587.155	630.31	556.31	633.905	661.54	664.65
13	Female	648.66	688.11	590.505	660.245	680.99	623.59	597.91	666.69
14	Female	604.555	607.43	571.445	580.46	610.43	592.08	575.63	657.29
15	Female	651.095	732.37	633.615	648.335	706.995	640.93	717.395	703.36
16	Female	635.45	657.635	659.725	661.975	570.465	616.485	593.815	743.995
17	Female	538.84	569.48	564.65	588.955	552.295	567.98	579.435	565.13
18	Female	523.88	545.165	504.865	593.315	564.405	513.99	495.475	552.995
19	Female	633.665	691.315	628.83	624.875	631.6	633.66	638.565	671.46
20	Female	624.12	620.495	624.06	665.665	667.16	621.885	624.51	640.1

## Sheet: ERROR
sNo	congruent	incongruent	gender_of_participants
1	1.25	1	Male
2	0.25	0	Male
3	0.875	0.5	Male
4	0.375	1.125	Male
5	1.125	0.5	Male
6	0.875	1.5	Male
7	0.5	0.625	Male
8	0.125	2	Male
9	0.625	1.375	Male
10	1	1.5	Male
11	1	2.5	Male
12	0.75	1.625	Male
13	0.5	0.5	Male
14	0.25	2	Male
15	0.5	2.25	Male
16	2.375	3.5	Male
17	0.875	0.375	Male
18	0.125	0.5	Male
19	1	0.375	Male
20	0.375	0.75	Male
1	1	0.875	Female
2	0.625	1.625	Female
3	0.125	1.75	Female
4	0.625	1.625	Female
5	0.75	1.25	Female
6	0.375	0.625	Female
7	0.125	0.75	Female
8	1.25	1.125	Female
9	0.75	1	Female
10	0.625	0.75	Female
11	1	1.25	Female
12	0.5	0.75	Female
13	0.625	0.375	Female
14	1	1.125	Female
15	1.125	1.5	Female
16	1.875	1.875	Female
17	0.25	1	Female
18	1.375	1	Female
19	0.625	0.875	Female
20	0.875	0.75	Female
